# Supplementary material for: Carbon dots, a powerful non-toxic support for bioimaging by fluorescence nanoscopy and eradication of bacteria by photothermia
Source: PubMed Central journal article supplement — Nanoscale Adv. 2019 May 17;1(7):2571–9. doi: 10.1039/c9na00140a (PMC9418816; doi:10.1039/c9na00140a), 2019-05-17
Supplement: NA-001-C9NA00140A-s001.pdf [file NA-001-C9NA00140A-s001.pdf]

## Supporting Information

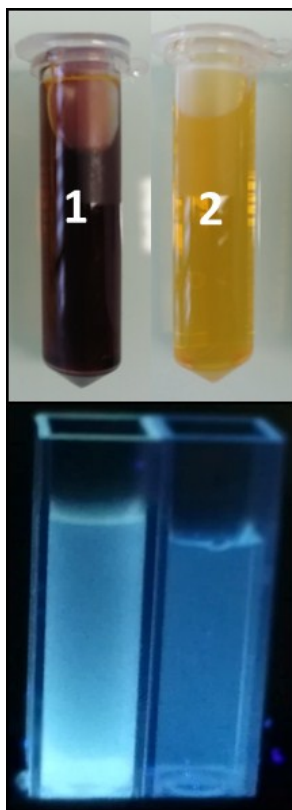

Figure SI-1: Comparison under daylight and 365 nm UV irradiation of two colloidal suspensions made by one-step alkali-assisted ultrasonic treatment with different ultrasonic power: 1) 100% power = 750 W (our work) and 2) 20% = 150 W.<sup>1</sup>

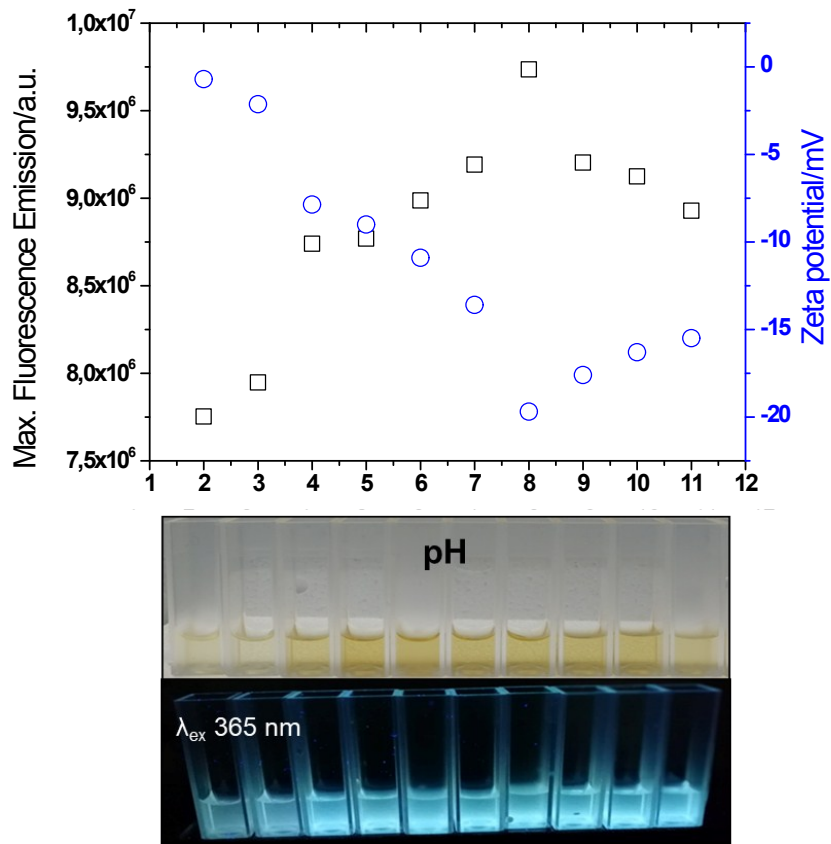

Figure SI-2: Zeta potential and fluorescence emission intensity of CDs at pH 2 to 11. Insets: CD suspensions at different pHs under daylight and 365 nm UV irradiation.

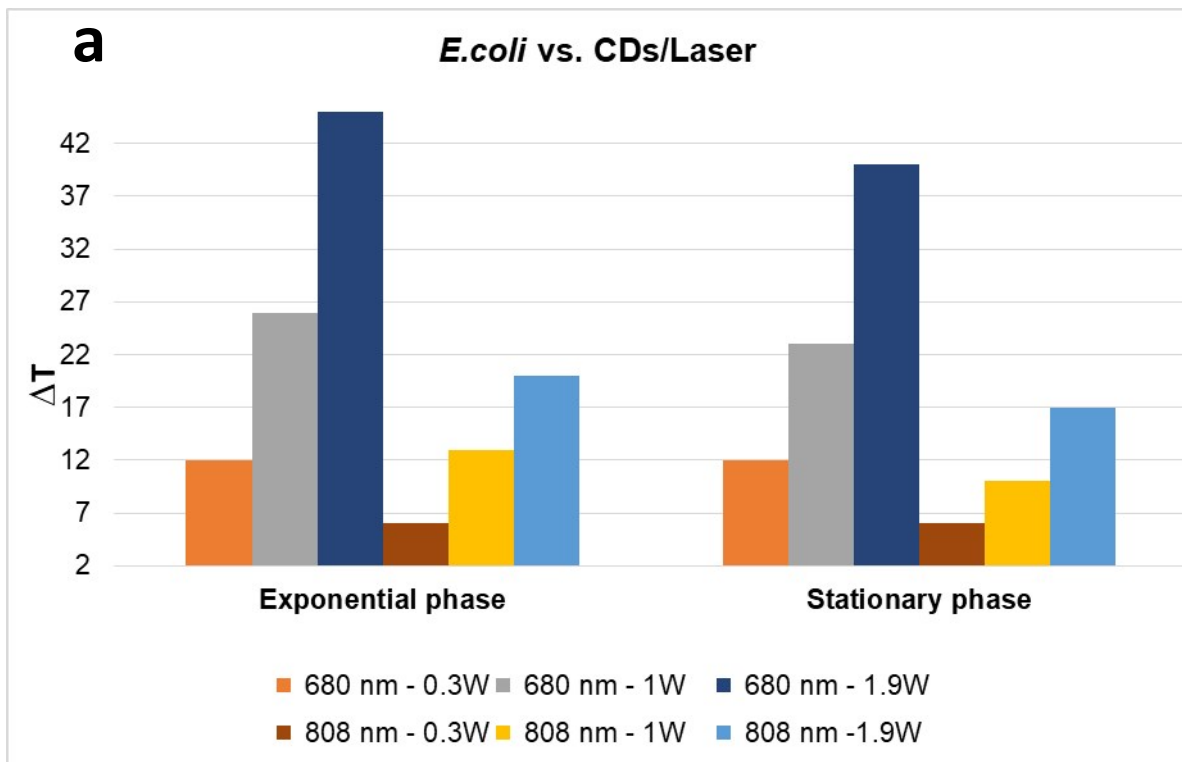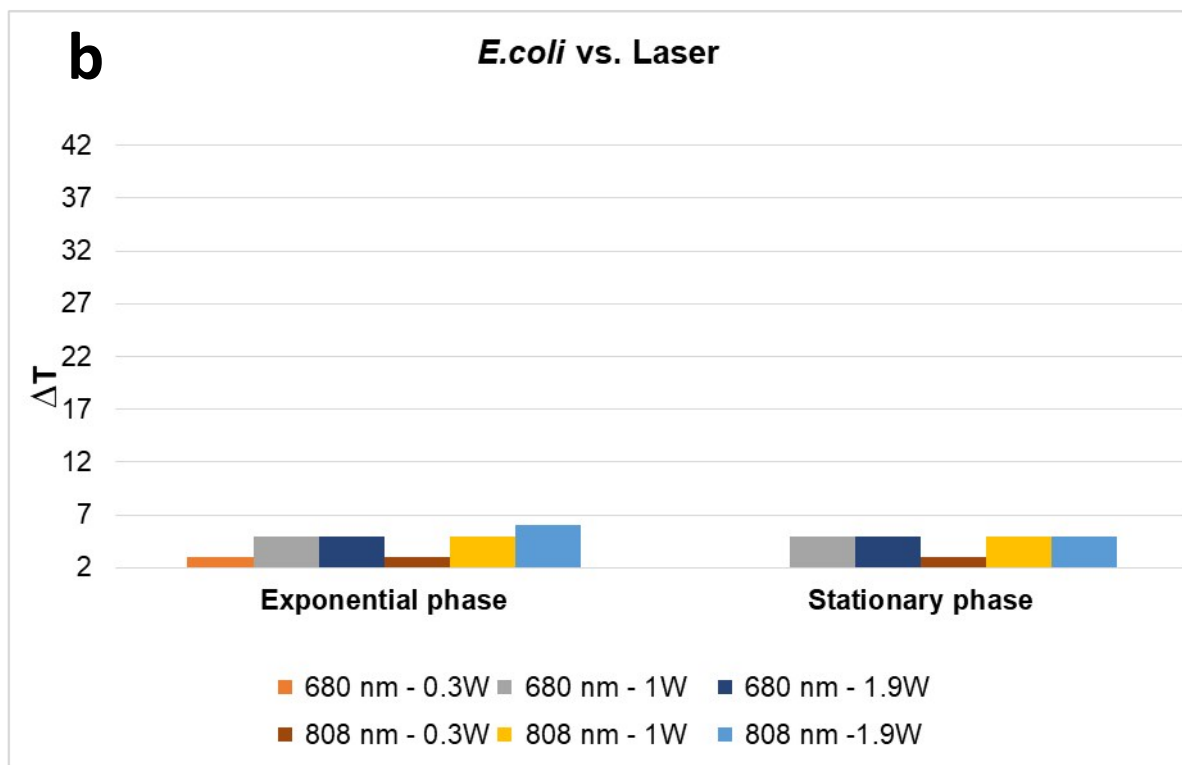

Figure SI-3:  $\Delta T$  values in PT mode under 808 and 680 nm laser (power densities: 0.3, 1, and 1.9 W  $\text{cm}^{-2}$ ) measured in exponential and stationary phase of *E. coli*: a) with CDs; b) without CDs.

Video SI-1

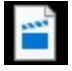

CDs8-blinking2.avi

Video SI-2

(see attached video)
